# Supplementary material for: Thiol–ene–epoxy thermoset for low-temperature bonding to biofunctionalized microarray surfaces
Source: Royal Society of Chemistry journal article supplement (doi:10.1039/c7lc00652g), 2017-01-01
Supplement: c7lc00652g1.pdf [file c7lc00652g1.pdf]

**Supporting Information.**

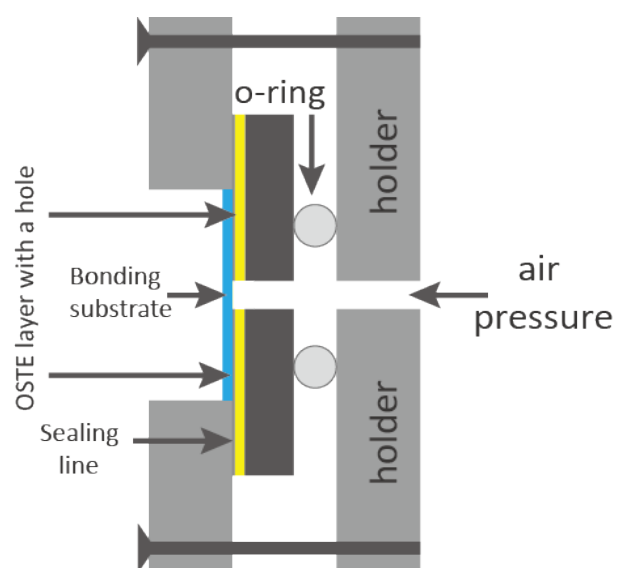

**Figure S1.** Setup of the bonding strength test. OSTEMER 327 layer with a hole is bonded with a substrate and air pressure was applied from the OSTE side. The whole setup was submerged in water for the detection of delamination between substrate and OSTEMER327. The maximum pressure tolerated was defined as the measured pressure when the substrate was detached from the OSTEMER layer, which was detected as a pressure drop step-response in Labview.

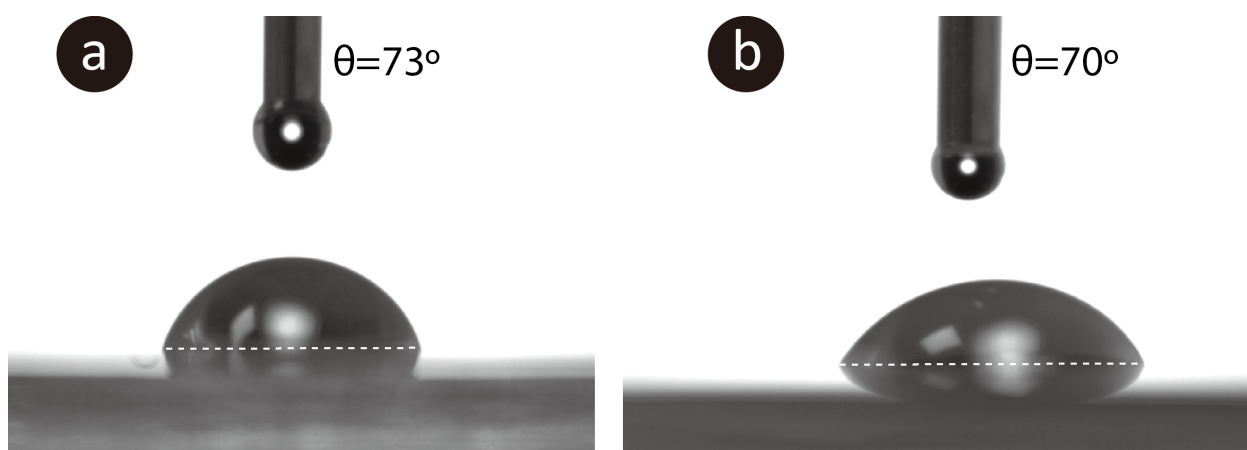

**Figure S2.** Water contact angle of OSTEMER-Biosticker, aka. OSTEMER 327 (a) and OSTE322 (b).

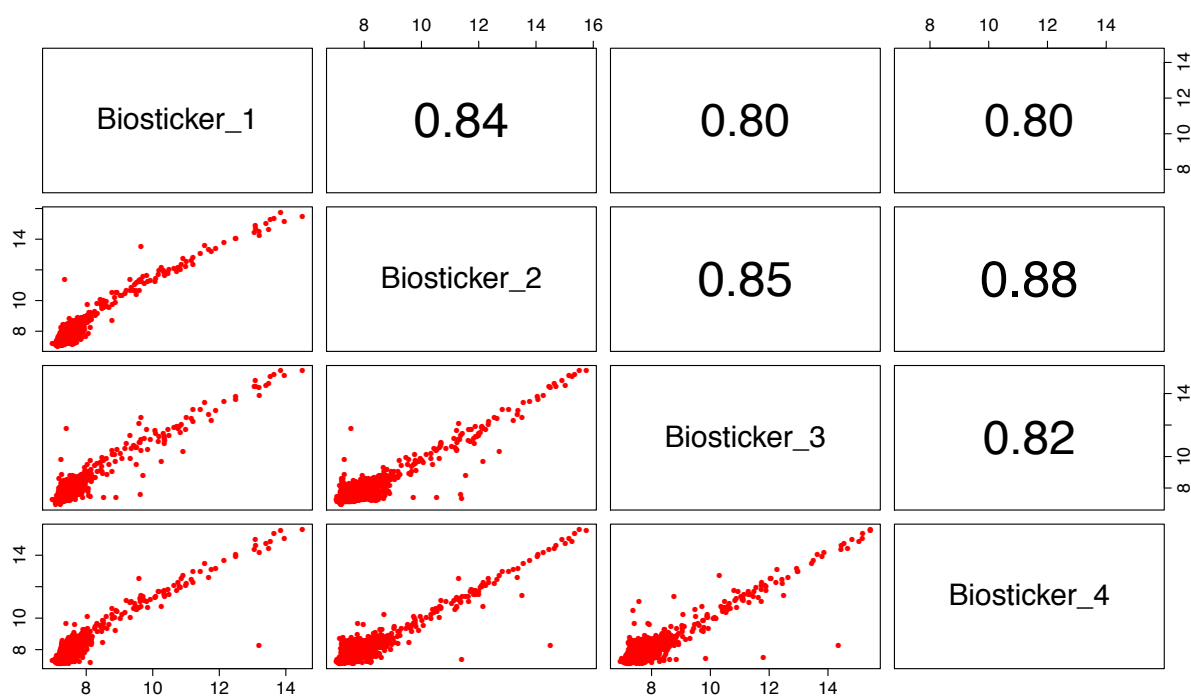

**Figure S3.** Comparison of the reactivity of the twenty-one rabbit antibodies against the

384 possible antigens as measured on the four Biosticker slides. The reactivity is presented as the  $\log_2$ -transformation of the median fluorescent intensity recoded in the spots of possible antigens on the slide. In each scatterplot the reactivity from each spot on one slide is plotted against the reactivity of the corresponding spot on the other slides for a pairwise comparison of correlation between slides. The scatterplots display the values recorded from the 8064 data points recorded on each slide, with one slide on each axis in an alternating fashion to display the correlation between all slides. The right upper part of the plots shows the corresponding measured results of Spearman's correlation coefficient  $\rho$  between each two slides.
